# Supplementary material for: SNVer: a statistical tool for variant calling in analysis of pooled or individual next-generation sequencing data
Source: PubMed Central journal article supplement — Nucleic Acids Res. 2011 Aug 3;39(19):e132. doi: 10.1093/nar/gkr599 (PMC3201884; doi:10.1093/nar/gkr599), 2011-08-03
Supplement: supp_gkr599_nar-01311-met-k-2011-File009.pdf [file supp_gkr599_nar-01311-met-k-2011-File009.pdf]

# SNVer: a statistical tool for variant calling in analysis of pooled or individual next-generation sequencing data

Zhi Wei<sup>1,\*</sup>, Wei Wang<sup>1</sup>, Pingzhao Hu<sup>2</sup>, Gholson J. Lyon<sup>3</sup>, Hakon Hakonarson<sup>3</sup>

<sup>1</sup>Department of Computer Science, New Jersey Institute of Technology, Newark, NJ, USA

<sup>2</sup>The Centre for Applied Genomics (TCAG) and Program in Genetics and Genome Biology, the Hospital for Sick Children, Toronto, ON, Canada

<sup>3</sup>Center for Applied Genomics, the Children's Hospital of Philadelphia, and Department of Pediatrics, University of Pennsylvania, Philadelphia, PA, USA

\*To whom correspondence should be addressed. Tel: +1 973 642 4497; Fax: +1 973 596 5777; Email: zhiwei@njit.edu

## Supplementary Material

Sup Table 1 FDR for SNVer and the Fisher's exact test employed by CRISP.

| Nominal FDR level = 0.1 |                 |       |                  |       |                   |       | Nominal FDR level = 0.05 |                 |       |                  |       |                   |       |
|-------------------------|-----------------|-------|------------------|-------|-------------------|-------|--------------------------|-----------------|-------|------------------|-------|-------------------|-------|
| N                       | MAF: 0.05 - 0.5 |       | MAF: 0.01 - 0.05 |       | MAF: 0.001 - 0.01 |       | N                        | MAF: 0.05 - 0.5 |       | MAF: 0.01 - 0.05 |       | MAF: 0.001 - 0.01 |       |
|                         | SNVer           | CRISP | SNVer            | CRISP | SNVer             | CRISP |                          | SNVer           | CRISP | SNVer            | CRISP | SNVer             | CRISP |
| 50                      | 0.013           | 0.400 | 0.013            | 0.242 | 0.035             | 0.142 | 50                       | 0.007           | 0.395 | 0.010            | 0.230 | 0.015             | 0.120 |
| 100                     | 0.010           | 0.453 | 0.016            | 0.312 | 0.032             | 0.146 | 100                      | 0.005           | 0.451 | 0.014            | 0.302 | 0.019             | 0.127 |
| 150                     | 0.010           | 0.469 | 0.013            | 0.353 | 0.024             | 0.159 | 150                      | 0.005           | 0.467 | 0.009            | 0.343 | 0.012             | 0.139 |
| 200                     | 0.009           | 0.476 | 0.014            | 0.382 | 0.022             | 0.159 | 200                      | 0.005           | 0.475 | 0.005            | 0.373 | 0.003             | 0.137 |
| 250                     | 0.008           | 0.480 | 0.010            | 0.400 | 0.020             | 0.168 | 250                      | 0.003           | 0.478 | 0.005            | 0.391 | 0.006             | 0.145 |
| 375                     | 0.006           | 0.484 | 0.011            | 0.424 | 0.012             | 0.183 | 375                      | 0.002           | 0.482 | 0.006            | 0.415 | 0.004             | 0.161 |
| 500                     | 0.007           | 0.486 | 0.011            | 0.437 | 0.016             | 0.198 | 500                      | 0.004           | 0.483 | 0.004            | 0.424 | 0.007             | 0.173 |
| 750                     | 0.006           | 0.487 | 0.010            | 0.444 | 0.019             | 0.212 | 750                      | 0.002           | 0.484 | 0.005            | 0.431 | 0.008             | 0.179 |
| 1000                    | 0.004           | 0.488 | 0.008            | 0.446 | 0.014             | 0.220 | 1000                     | 0.002           | 0.485 | 0.004            | 0.432 | 0.007             | 0.180 |
| 1500                    | 0.004           | 0.488 | 0.007            | 0.448 | 0.015             | 0.220 | 1500                     | 0.001           | 0.485 | 0.002            | 0.433 | 0.007             | 0.179 |
| 2000                    | 0.004           | 0.488 | 0.006            | 0.450 | 0.015             | 0.228 | 2000                     | 0.002           | 0.484 | 0.004            | 0.437 | 0.007             | 0.178 |

## GATK:

Based on the latest recommendations from the authors of GATK

([http://www.broadinstitute.org/gsa/wiki/index.php/Best\\_Practice\\_Variant\\_Detection\\_with\\_the\\_GATK\\_v2](http://www.broadinstitute.org/gsa/wiki/index.php/Best_Practice_Variant_Detection_with_the_GATK_v2)), we removed variant calls based on having any of the following criteria: (1) SNVs within clusters (3 SNVs within 10 bp of each other); (2) more than four reads with mapping quality of zero (MQ0) and more than 10% of reads with mapping quality of zero; (3) strand bias (SB) higher than or equal to -1.0; (4) SNV quality score less than 30; (5) quality-by-depth (QD) score less than 5.0; (6) largest Contiguous Homopolymer Run of Variant Allele (HRun) more than 5; or (7) SNVs around a potential indel. Finally, we removed all variants with depth coverage less than 6 so that we have comparable numbers of variant as SNVer.
